# Supplementary material for: CircUbe3a from M2 macrophage-derived small extracellular vesicles mediates myocardial fibrosis after acute myocardial infarction
Source: PubMed Central journal article supplement (PMC8120198; doi:10.7150/thno.52843), 2021-04-15
Supplement: thnov11p6315s1.pdf [file thnov11p6315s1.pdf]

# **CircUbe3a from M2 macrophage-derived small extracellular vesicles mediates myocardial fibrosis after acute myocardial infarction**

Yan Wang<sup>1&</sup>, Chaofu Li<sup>1&</sup>, Ranzun Zhao<sup>1&</sup>, Zhimei Qiu<sup>1</sup>, Changyin Shen<sup>2</sup>, Zhenglong Wang<sup>1</sup>, Weiwei Liu<sup>1</sup>, Wei Zhang<sup>1</sup>, Junbo Ge<sup>3</sup> and Bei Shi<sup>1\*</sup>

<sup>1</sup>Department of Cardiology, Affiliated Hospital of Zunyi Medical University, Zunyi 563000, China

<sup>2</sup>Department of Cardiology, The Second Affiliated Hospital of Zunyi Medical University, Zunyi 563000, China

<sup>3</sup>Department of Cardiology, Shanghai Institute of Cardiovascular Diseases, Zhongshan Hospital, Fudan University, Shanghai 200032, China

<sup>&</sup>Those authors contributed equally to this work.

Correspondence should be addressed to Bei Shi; shib@zmu.edu.cn

## **Supplementary tables and figures**

**Figure S1.** EVs injected via the intramyocardial and tail vein routes are internalized by cardiomyocytes.

**Figure S2.** Echocardiography was performed to evaluate the effects of different EV injection methods on cardiac function in mice.

**Figure S3.** Morphological characteristics and identification of various types of macrophages.

**Figure S4.** Effects of EVs of different sizes on the proliferation of fibroblasts.

**Figure S5.** Comparison of the effects of M0M-, M1M-, and M2M-SEVs on the proliferation and migration of CFs.

**Figure S6.** Morphological characteristics and phenotypic identification of M0M- and M2M-SEVs.

**Figure S7.** CircUbe3a promotes the proliferation, migration and myofibroblastic transformation of CFs.

**Figure S8.** Assessment of the cardiac-specific circUbe3a overexpression and inhibition efficiencies via rAAV transduction.

**Figure S9.** miR-138-5p regulates the proliferation, migration and myofibroblastic transformation of CFs.

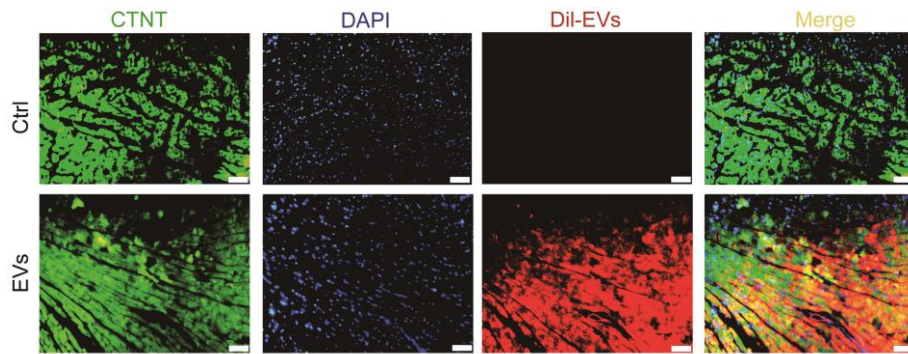

**Figure S1. EVs injected via the intramyocardial and tail vein routes are internalized by cardiomyocytes (CMs).** DiI-labeled M2M-EVs were injected into mice via the tail vein for 72 h. The relative fluorescence intensity (red) was quantified to identify the uptake of EVs by CMs. Scale bar=50  $\mu\text{m}$  (n=5).

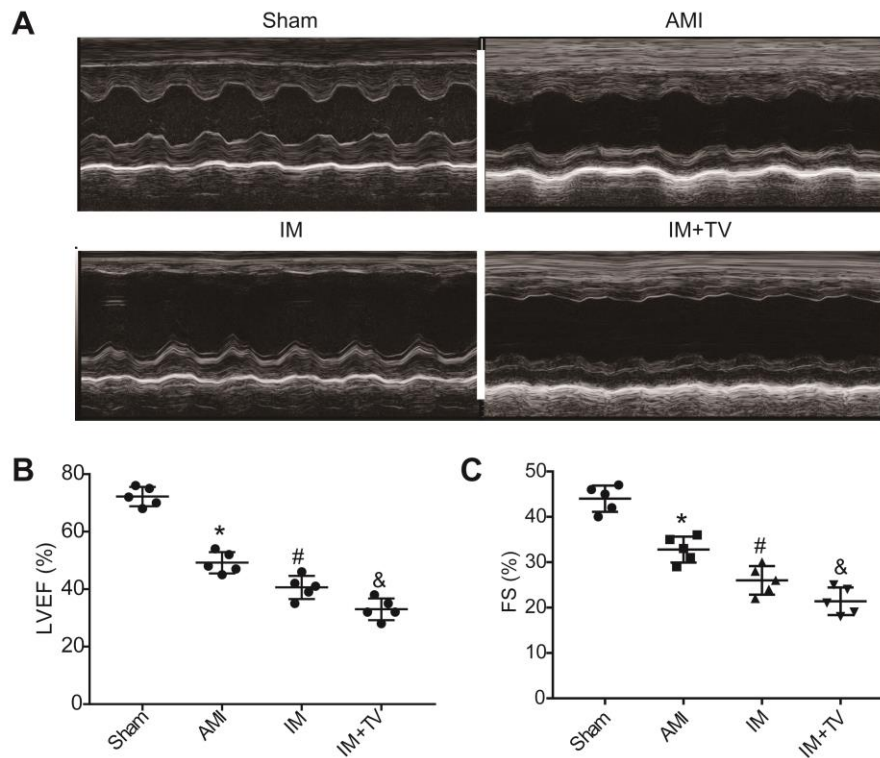

**Figure S2. Echocardiography was performed to evaluate the effects of different EV injection methods on cardiac function in mice.** A: Representative echocardiographic images. B and C: The LVEF (%) and FS values in the indicated groups were calculated (\* $P < 0.05$  versus the sham group; # $P < 0.05$  versus the AMI group; & $P < 0.05$  versus the IM group; n=5 per group).

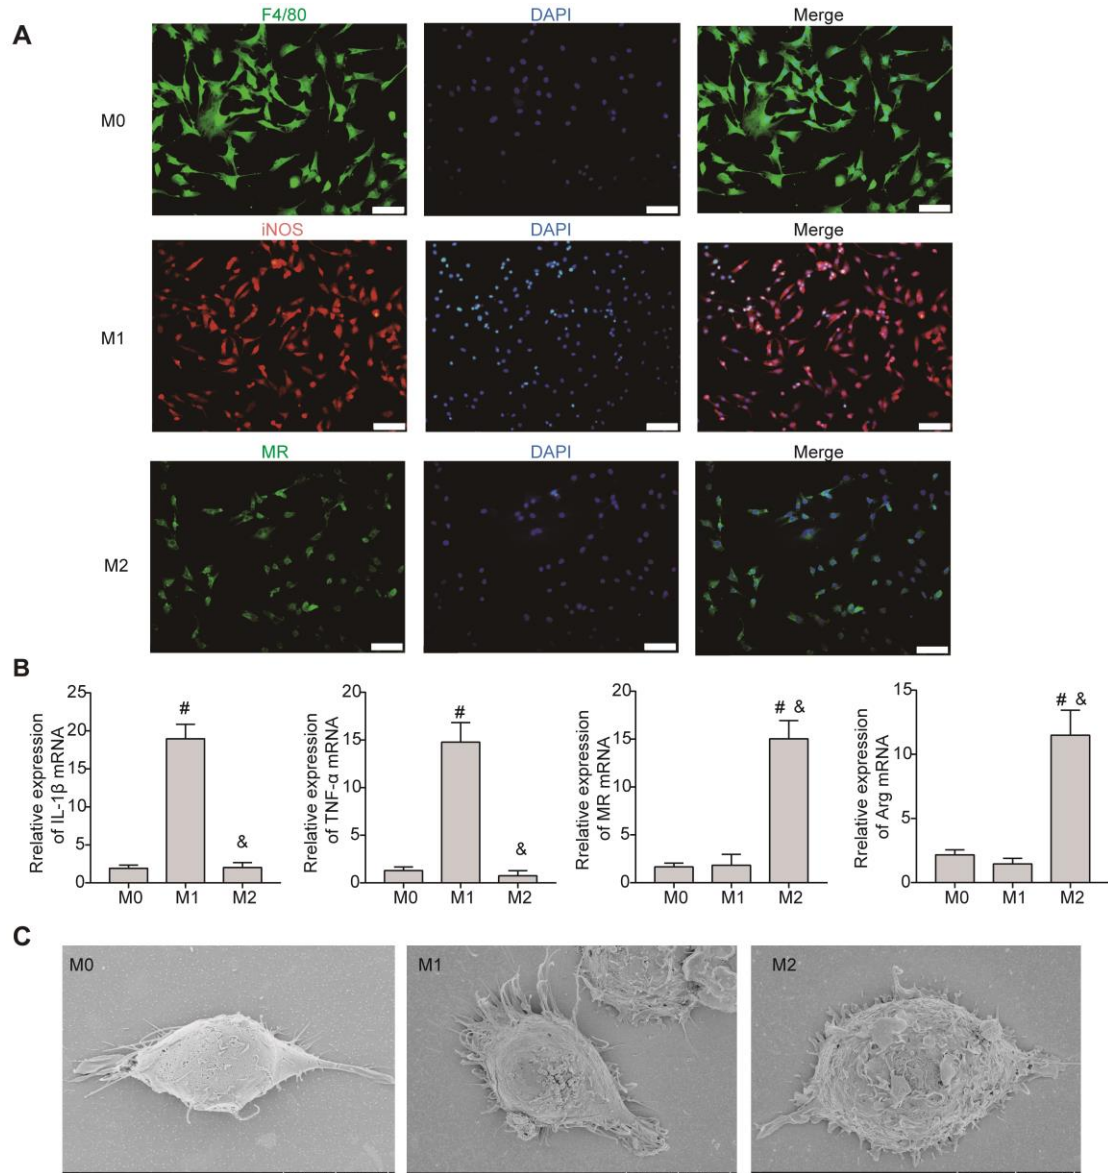

**Figure S3. Morphological characteristics and identification of various macrophage types. A:** Representative immunofluorescence images of surface markers on various macrophage types. Scale bar=50  $\mu$ m. **B:** qRT-PCR was used to detect the expression of specific M1- and M2-related genes in various macrophage types. **C:** The morphology of macrophages was visualized by scanning electron microscopy.

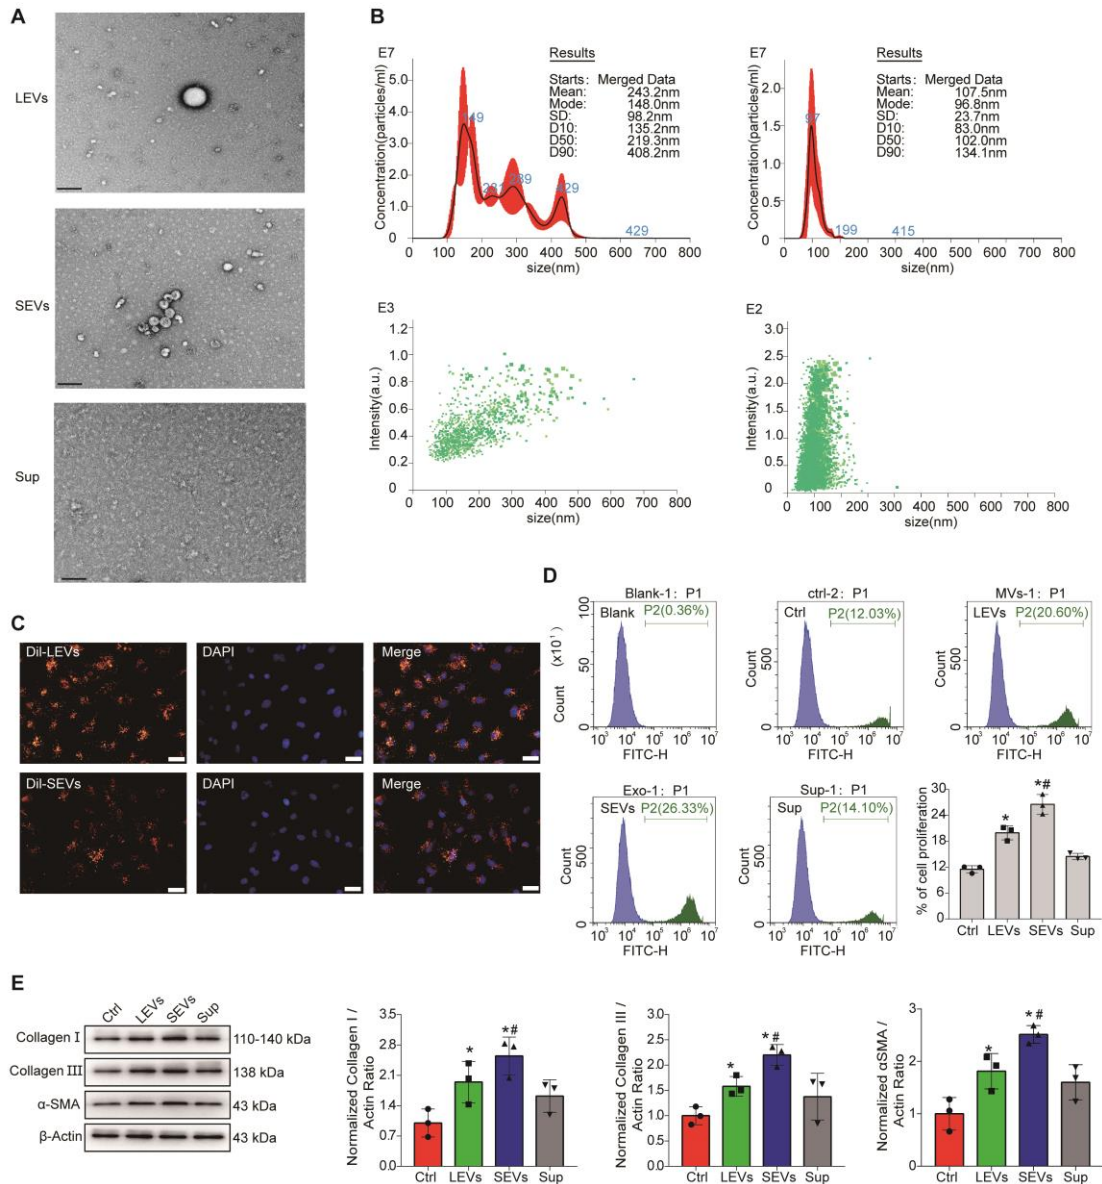

**Figure S4. Effects of EVs of different sizes on the proliferation of fibroblasts. A:** TEM demonstrated that the LEVs and SEVs secreted by M2Ms were cup-shaped vesicles. **B:** Size distributions of LEVs and SEVs isolated from M2M-conditioned medium, as determined by NTA. **C:** Uptake of LEVs and SEVs by CFs was assessed by immunofluorescence staining. Scale bar=50  $\mu$ m. **D:** Effects of EVs of different sizes on CF proliferation, as determined by the EdU assay. **E:** Representative Western blot results from three independent experiments and quantification of collagen I, collagen III, and  $\alpha$ -SMA expression in CFs treated with LEVs, SEVs and Sup (\* $P$ <0.05 versus the Ctrl group; # $P$ <0.05 versus the LEVs group; n=3 per group).

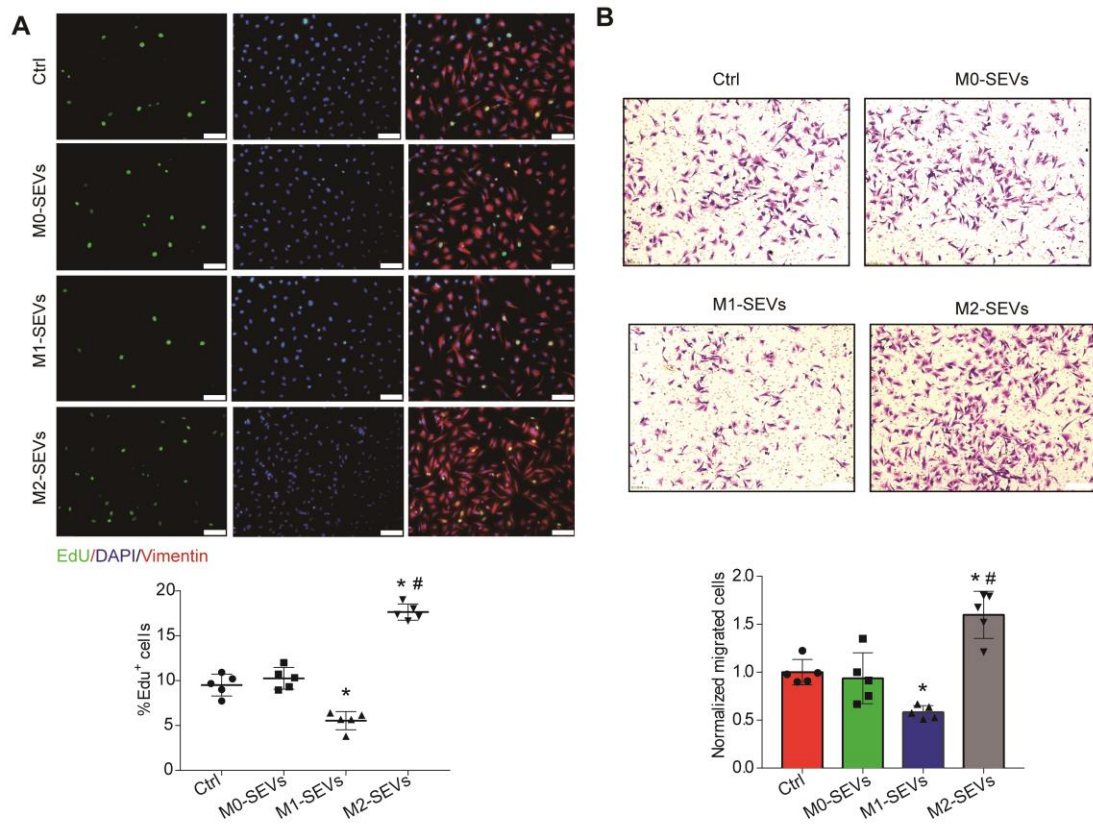

**Figure S5. Comparison of the effects of M0M-, M1M-, and M2M-SEVs on the proliferation and migration of CFs.** **A:** Representative immunofluorescence images showing the CF expression levels in different groups. The number of EdU-positive nuclei was used to assess cell proliferation. Scale bar=50  $\mu$ m. **B:** The transwell assay was performed to evaluate the migration of CFs treated with M0-SEVs, M1-SEVs and M2-SEVs (\* $P$ <0.05 versus the Ctrl group; # $P$ <0.05 versus the M0-SEVs group;  $n$ =3 per group).

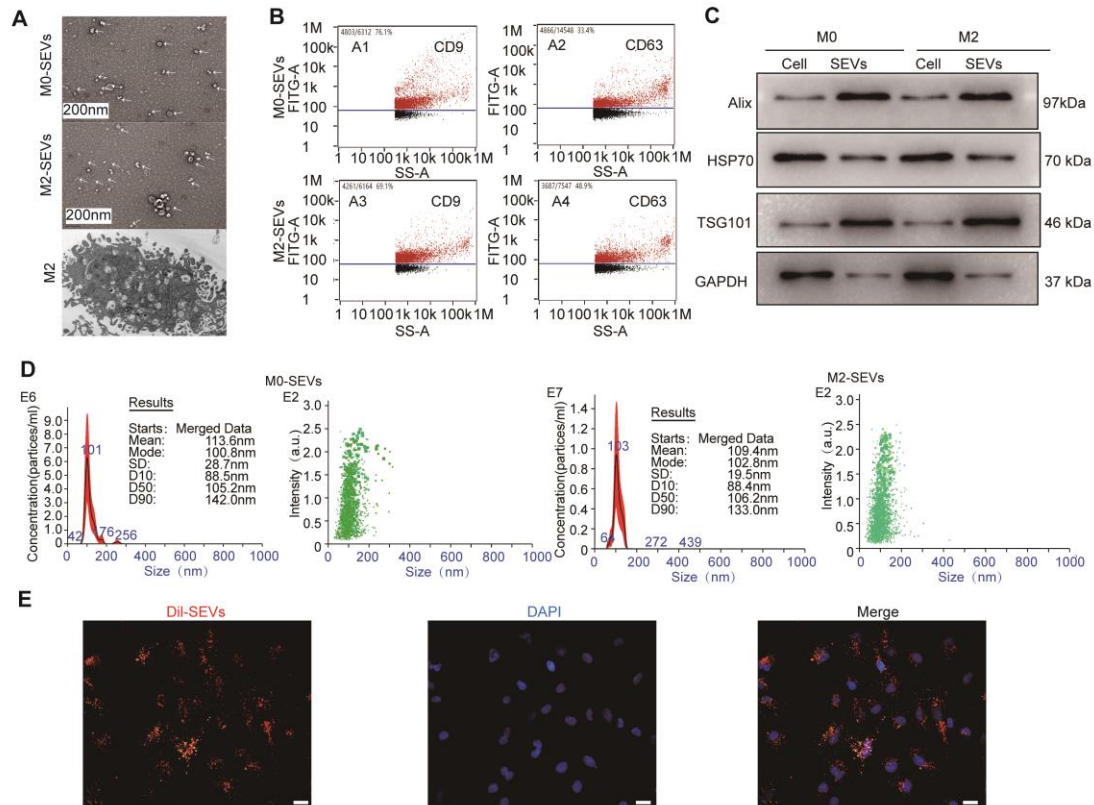

**Figure S6. Morphological characteristics and phenotypic identification of M0M- and M2M-SEVs. A:** TEM demonstrated that the SEVs secreted by M0Ms or M2Ms were cup-shaped vesicles. **B:** The markers CD63 and CD9 in M0M-SEVs and M2M-SEVs were detected by FCM. **C:** Alix, HSP70, and TSG101 protein expression was detected by Western blot analysis. **D:** Size distributions of SEVs isolated from M0M- or M2M-conditioned medium, as determined by NTA. **E:** The uptake of SEVs by CFs was measured by immunofluorescence staining. Scale bar=50  $\mu$ m.

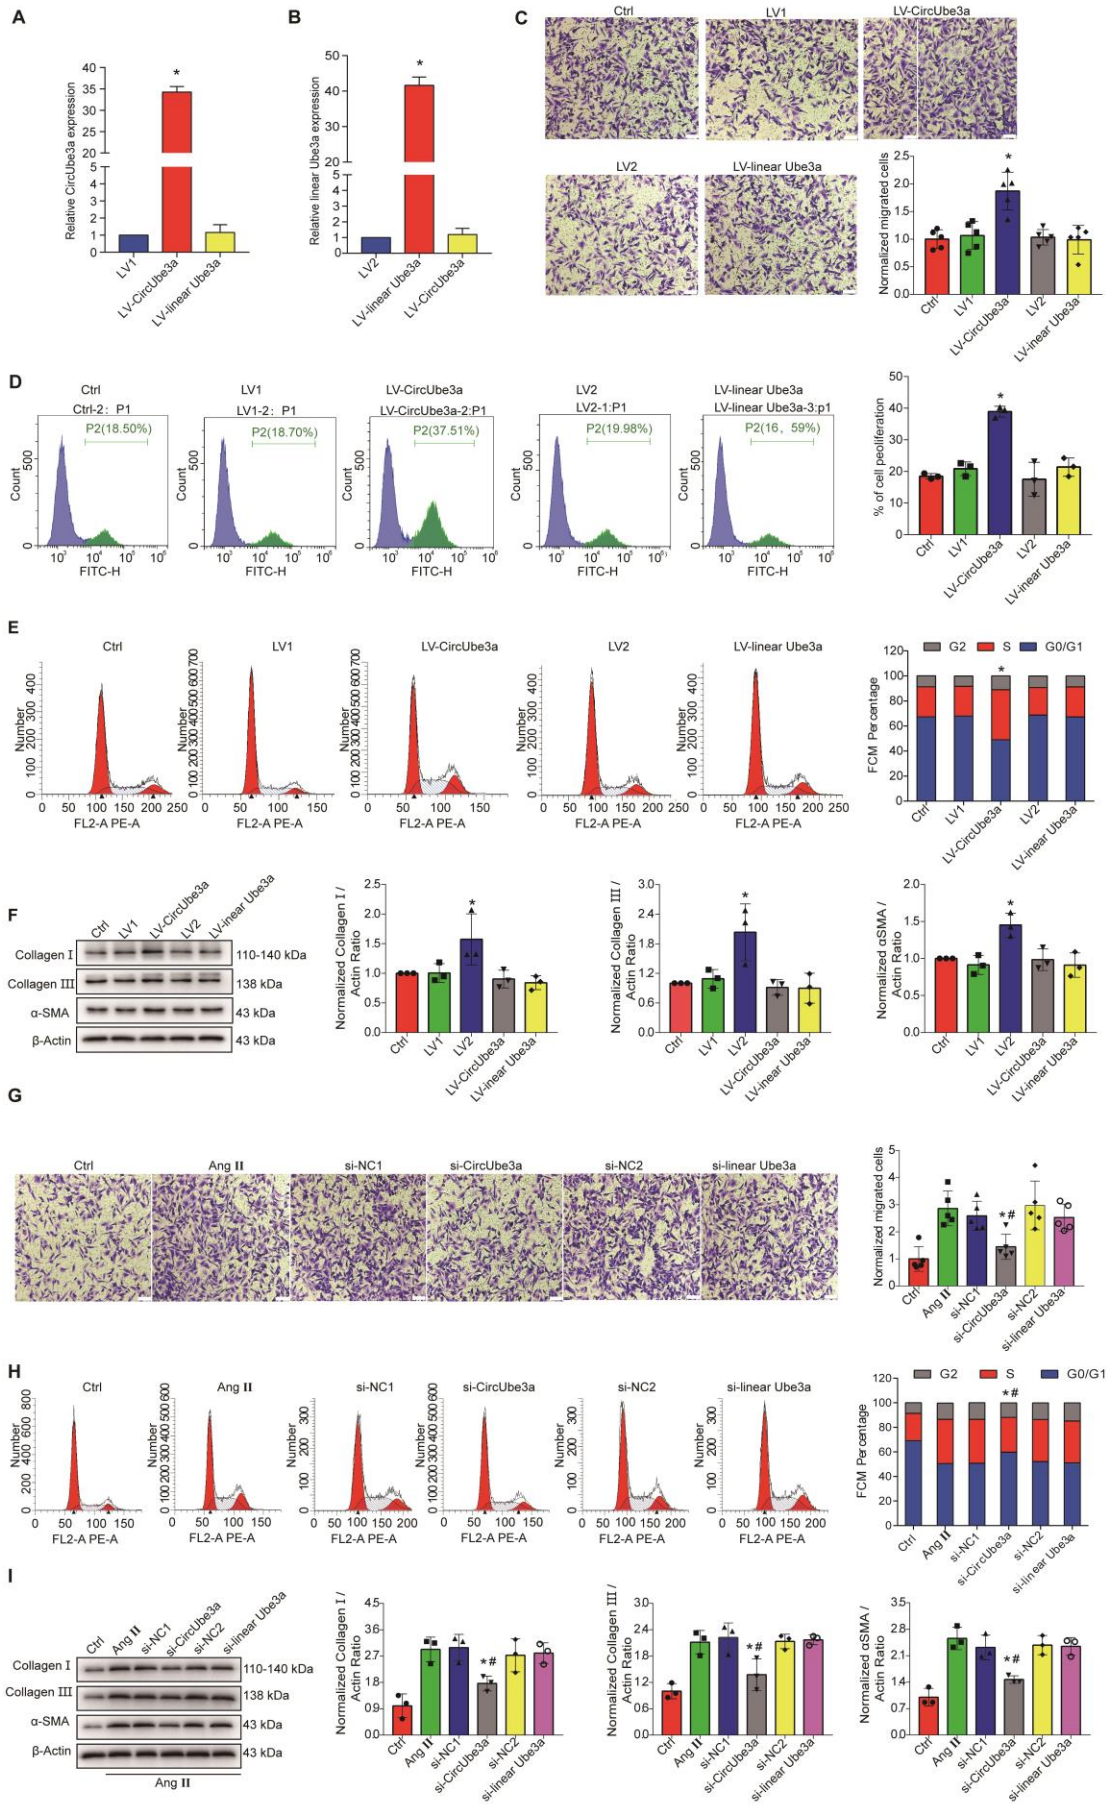

**Figure S7. CircUbe3a promotes the proliferation, migration and myofibroblastic transformation of CFs.** CFs were treated with LV-circUbe3a, LV-linear Ube3a, si-circUbe3a, si-linear Ube3a or their corresponding NCs to assess the effect of circUbe3a. **A and B:** qPCR analysis of circUbe3a and Ube3a mRNA expression in CFs ( $*P<0.05$  versus the LV1 group). **C:** Transwell assays were performed to assess CF migration after treatment with LV-circUbe3a or LV-linear Ube3a. **D:** The EdU assay was performed to evaluate CF proliferation after treatment with LV-circUbe3a or LV-linear Ube3a. **E:** FCM after the transduction of LV-circUbe3a or LV-linear Ube3a indicated that circUbe3a is positively associated with cell cycle progression in CFs. **F:** Western blot analysis of the protein expression of collagen I, collagen III, and  $\alpha$ -SMA in cells treated with LV-circUbe3a or LV-linear Ube3a ( $*P<0.05$  versus the Ctrl group;  $n=3$  per group). **G:** The transwell assay was performed to assess CF migration after treatment with si-circUbe3a or si-linear Ube3a. **H:** FCM after treatment with si-circUbe3a or si-linear Ube3a indicated that circUbe3a is positively associated with cell cycle progression in CFs. **I:** Western blot analysis of the protein expression of collagen I, collagen III, and  $\alpha$ -SMA in cells treated with si-circUbe3a or si-linear Ube3a ( $*P<0.05$  versus the Ctrl group;  $^{\#}P<0.05$  versus the Ang II group;  $n=3$  per group).

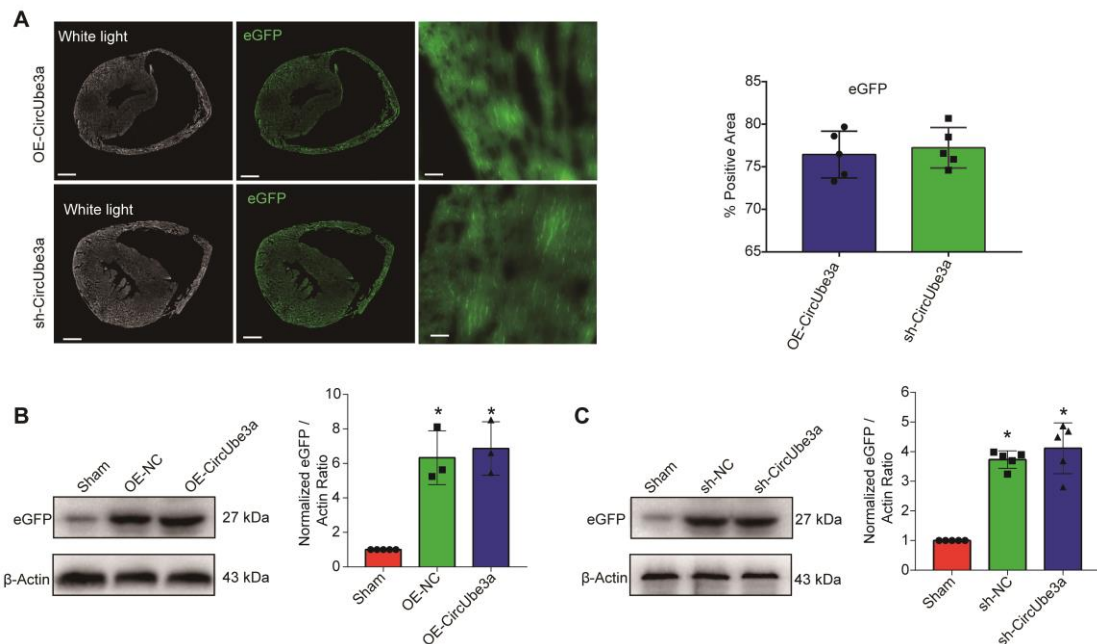

**Figure S8. Assessment of the cardiac-specific circUbe3a overexpression and inhibition efficiencies via rAAV transduction.** **A:** Immunofluorescence was used to detect the rAAV-mediated circUbe3a transduction efficiency. Scale bars=1000  $\mu$ m. **B:**



Representative Western blot results from three independent experiments and quantification of eGFP expression in cardiac muscle tissues treated with rAAV-circUbe3a, rAAV-shcircUbe3a or its NC (\* $P < 0.05$  versus the sham group;  $n = 6$  per group).

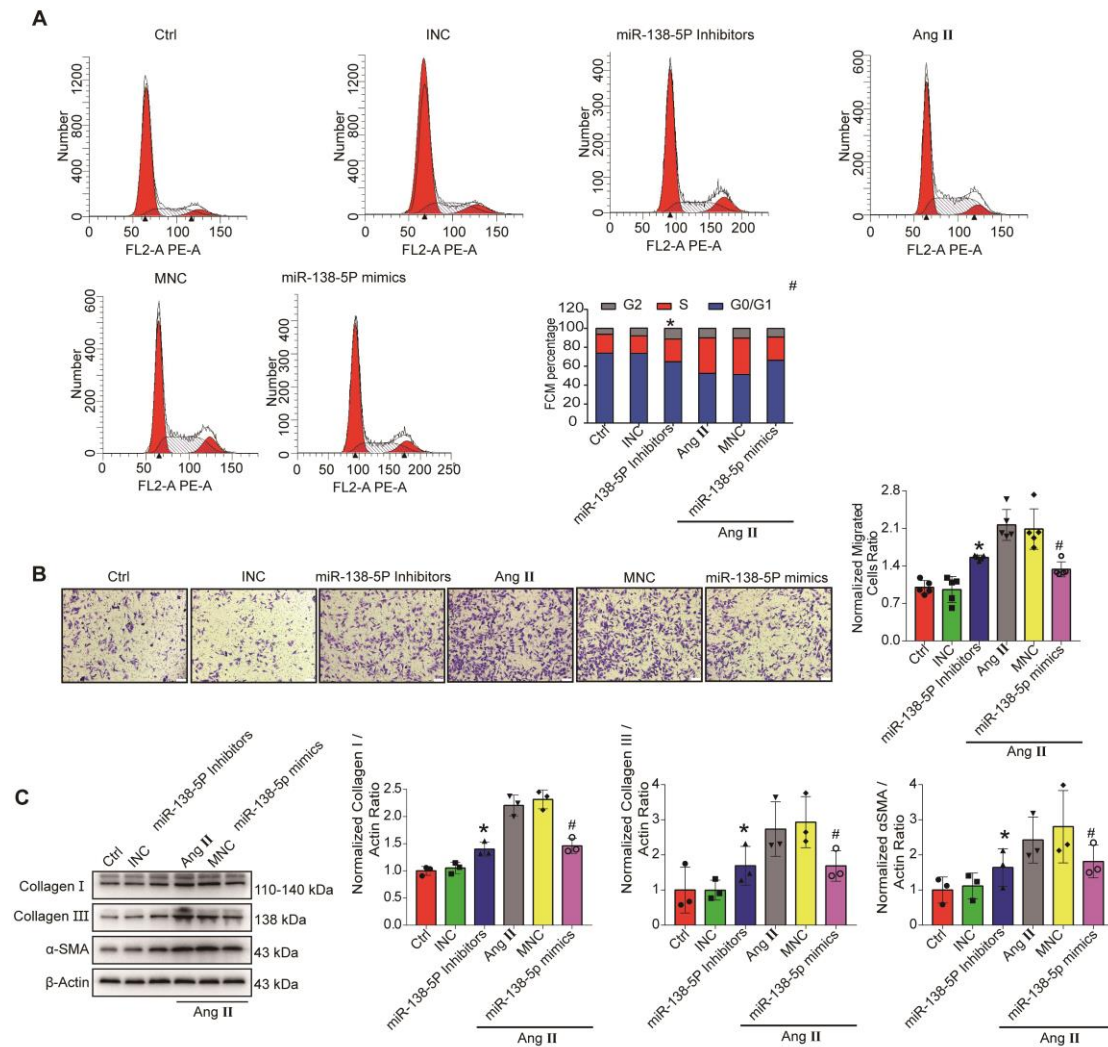

**Figure S9. miR-138-5p regulates the proliferation, migration and myofibroblastic transformation of CFs.** miR-138-5p mimics, inhibitors, and their corresponding NCs were transfected into CFs to assess the effect of miR-138-5p in CFs. **A:** FCM indicated that miR-138-5p is negatively associated with cell cycle progression in CFs. **B:** The transwell assay was performed to assess CF migration after treatment with miR-138-5p mimics or miR-138-5p inhibitors. **C:** Representative Western blot results from three independent experiments and quantification of collagen I, collagen III, and  $\alpha$ -SMA expression in CFs treated with miR-138-5p mimics, miR-138-5p inhibitors or their

corresponding NCs (\* $P < 0.05$  versus the Ctrl group; # $P < 0.05$  versus the miR-138-5p inhibitor group; n=3 per group).
